# Supplementary material
Source: PubMed Central journal article supplement (PMC3324435)
Supplement: supp_kwr409_kwr409_Web_Tables.pdf [file supp_kwr409_kwr409_Web_Tables.pdf]

**Web Table 1: Full regression output for all Add Health respondents for models presented in Table 1.**

|                                           | (1)                    | (2)                    | (3)                    | (4)                    | (5)                   |
|-------------------------------------------|------------------------|------------------------|------------------------|------------------------|-----------------------|
| <b>Parental Incarceration</b>             |                        |                        |                        |                        |                       |
| <i>Parent Ever Incarcerated</i>           | 0.358**<br>(0.107)     | 0.382**<br>(0.118)     | 0.383**<br>(0.118)     | 0.365**<br>(0.118)     | 0.226<br>(0.271)      |
| <i>Parent Incarcerated Waves II-IV</i>    |                        |                        |                        |                        |                       |
| Male                                      | 0.065<br>(0.08)        | 0.164+<br>(0.09)       | 0.164+<br>(0.092)      | 0.112<br>(0.092)       | 0.172+<br>(0.103)     |
| <b>Race</b>                               |                        |                        |                        |                        |                       |
| <i>White [Reference]</i>                  |                        |                        |                        |                        |                       |
| <i>Black</i>                              | 1.387***<br>(0.111)    | 1.086***<br>(0.133)    | 1.087***<br>(0.133)    | 1.056***<br>(0.133)    | 0.856***<br>(0.127)   |
| <i>Hispanic</i>                           | 0.952***<br>(0.126)    | 0.586***<br>(0.146)    | 0.586***<br>(0.146)    | 0.594***<br>(0.146)    | 0.978***<br>(0.144)   |
| <i>Asian</i>                              | -0.811***<br>(0.185)   | -0.714***<br>(0.207)   | -0.714**<br>(0.206)    | -0.718**<br>(0.206)    | -0.477*<br>(0.213)    |
| <i>Native American</i>                    | 1.712***<br>(0.334)    | 1.667***<br>(0.332)    | 1.669***<br>(0.332)    | 1.645***<br>(0.331)    | 0.724+<br>(0.378)     |
| <i>Other Race</i>                         | -0.214<br>(0.460)      | -0.196<br>(0.459)      | -0.195<br>(0.458)      | -0.211<br>(0.457)      | 0.297<br>(0.535)      |
| Age                                       | 1.137***<br>(0.025)    | 1.138***<br>(0.024)    | 1.140***<br>(0.025)    | 1.143***<br>(0.025)    | -0.245***<br>(0.0326) |
| Age-Squared                               | -0.0144***<br>(0.0006) | -0.0145***<br>(0.0006) | -0.0145***<br>(0.0006) | -0.0146***<br>(0.0006) |                       |
| <b>Parental SES</b>                       |                        |                        |                        |                        |                       |
| <i>Less Than High School</i>              |                        |                        |                        |                        |                       |
|                                           |                        | 1.174***<br>(0.163)    | 1.174***<br>(0.163)    | 1.181***<br>(0.163)    |                       |
| <i>High School</i>                        |                        |                        |                        |                        |                       |
|                                           |                        | 0.650***<br>(0.114)    | 0.651***<br>(0.115)    | 0.642***<br>(0.114)    |                       |
| <i>Bachelor's Degree [Reference]</i>      |                        |                        |                        |                        |                       |
| Respondent History of Arrest              |                        | -0.497***<br>(0.104)   | -0.497***<br>(0.104)   | -0.494***<br>(0.104)   |                       |
| <b>Wave I Family Structure</b>            |                        |                        |                        |                        |                       |
| <i>Two Parent, Biological [Reference]</i> |                        |                        |                        |                        |                       |
| <i>Two Parent, One Biological</i>         |                        | -0.274+<br>(0.143)     | -0.274+<br>(0.143)     | -0.277+<br>(0.142)     |                       |
| <i>Single Mother</i>                      |                        | 0.341**<br>(0.128)     | 0.342**<br>(0.128)     | 0.339**<br>(0.127)     |                       |
| <i>Single Father</i>                      |                        | -0.515*<br>(0.247)     | -0.543*<br>(0.248)     | -0.537*<br>(0.248)     |                       |
| <i>Other Family Structure</i>             |                        | 0.180<br>(0.205)       | 0.182<br>(0.205)       | 0.193<br>(0.205)       |                       |
| Biological Father Unknown at Wave I       |                        | 0.103<br>(0.168)       | 0.103<br>(0.168)       | 0.108<br>(0.168)       |                       |
| Father Closeness                          |                        | 0.172***<br>(0.041)    | 0.172***<br>(0.041)    | 0.166***<br>(0.041)    |                       |

|                                                              |                     |                     |                     |                     |                          |
|--------------------------------------------------------------|---------------------|---------------------|---------------------|---------------------|--------------------------|
| Repeated Childhood Physical Abuse                            | 0.437**<br>(0.160)  | 0.438**<br>(0.160)  | 0.438**<br>(0.160)  |                     |                          |
| Proportion of Families in County Residing Below Poverty      | 5.588***<br>(0.853) | 5.590***<br>(0.853) | 5.537***<br>(0.853) |                     |                          |
| Proportion of Families in County Classified as Non-White     | 0.048<br>(0.374)    | 0.048<br>(0.374)    | 0.082<br>(0.373)    |                     |                          |
| Census Tract Population Density                              | -0.051<br>(0.034)   | -0.050<br>(0.035)   | -0.054<br>(0.035)   |                     |                          |
| Low Self Control                                             | 0.557***<br>(0.107) | 0.559***<br>(0.107) | 0.558***<br>(0.107) |                     |                          |
| Proportion of Stressful Life Events                          |                     | -0.098<br>(0.172)   | -0.006<br>(0.174)   |                     |                          |
| Depression                                                   |                     |                     |                     | -0.024**<br>(0.007) |                          |
| Suicidal Thoughts                                            |                     |                     |                     | 0.018<br>(0.062)    |                          |
| Hours of Sedentary Behaviors Per Day                         |                     |                     |                     | 0.058***<br>(0.006) |                          |
| Fast Food Consumption at Wave IV                             |                     |                     |                     | -0.020<br>(0.021)   |                          |
| Soft Drink Consumption at Wave IV                            |                     |                     |                     | 0.574*<br>(0.227)   |                          |
| Intercept                                                    | 8.055***<br>(0.262) | 6.169***<br>(0.332) | 6.153***<br>(0.346) | 5.562***<br>(0.411) |                          |
| BMI Wave II                                                  |                     |                     |                     |                     | 0.099***<br>(0.0099)     |
| Depression Wave II                                           |                     |                     |                     |                     | 0.0505*<br>(0.019)       |
| Proportion of Stressful Life Events at Wave II               |                     |                     |                     |                     | v2<br>-0.0119<br>(0.810) |
| Increase in Depression, Waves II-IV                          |                     |                     |                     |                     | 0.00654<br>(0.112)       |
| Increase In Suicidal Thoughts, Waves II-IV                   |                     |                     |                     |                     | 0.381+<br>(0.228)        |
| Increase in Proportion of Stressful Life Events , Wave II-IV |                     |                     |                     |                     | 0.0800<br>(0.121)        |
| First Arrest, Waves II-IV                                    |                     |                     |                     |                     | -0.391**<br>(0.123)      |
| Intercept                                                    | 8.055***<br>(0.262) | 6.169***<br>(0.332) | 6.153***<br>(0.346) | 5.562***<br>(0.411) | 6.935***<br>(0.555)      |
| R-Square                                                     | 0.1856              | 0.1972              | 0.1972              | 0.1994              | 0.025                    |
| Number of Individuals                                        | 15470               | 15470               | 15470               | 15470               | 10514                    |
| Number of Observations                                       | 52388               | 52388               | 52388               | 52388               |                          |

**Notes:**

Random effects coefficients with standard errors in parentheses.

\* $p < .05$  \*\* $p < .01$  \*\*\* $p < .001$  [two-tailed test], +  $p < 0.05$  [one-tailed test].

**Web Table 2: Full regression output for male Add Health respondents for models presented in Table 1.**

|                                            | (1)                    | (2)                    | (3)                    | (4)                    | (5)                   |
|--------------------------------------------|------------------------|------------------------|------------------------|------------------------|-----------------------|
| <b>Parental Incarceration</b>              |                        |                        |                        |                        |                       |
| <i>Parent Ever Incarcerated</i>            | 0.039<br>(0.148)       | 0.160<br>(0.163)       | 0.171<br>(0.164)       | 0.158<br>(0.163)       | -0.522<br>(0.352)     |
| <i>Parent Incarcerated Waves II-IV</i>     |                        |                        |                        |                        |                       |
| <b>Race</b>                                |                        |                        |                        |                        |                       |
| <i>White [Reference]</i>                   |                        |                        |                        |                        |                       |
| <i>Black</i>                               | 0.351*<br>(0.111)      | 0.166<br>(0.186)       | 0.181<br>(0.186)       | 0.156<br>(0.186)       | 0.163<br>(0.168)      |
| <i>Hispanic</i>                            | 1.165***<br>(0.169)    | 0.964***<br>(0.198)    | 0.971***<br>(0.199)    | 0.977***<br>(0.198)    | 1.273***<br>(0.183)   |
| <i>Asian</i>                               | -0.111<br>(0.242)      | -0.144<br>(0.271)      | -0.145<br>(0.271)      | -0.131<br>(0.271)      | -0.185<br>(0.266)     |
| <i>Native American</i>                     | 1.410***<br>(0.243)    | 1.420**<br>(0.436)     | 1.433**<br>(0.436)     | 1.387**<br>(0.436)     | 0.445<br>(0.462)      |
| <i>Other Race</i>                          | 0.935<br>(0.611)       | 1.002<br>(0.611)       | 1.009+<br>(0.611)      | 0.993+<br>(0.611)      | 0.418<br>(0.651)      |
| <b>Age</b>                                 | 1.146***<br>(0.033)    | 1.147***<br>(0.033)    | 1.163***<br>(0.033)    | 1.161***<br>(0.033)    | -0.298***<br>(0.0415) |
| <b>Age-Squared</b>                         | -0.0148***<br>(0.0007) | -0.0148***<br>(0.0007) | -0.0150***<br>(0.0007) | -0.0150***<br>(0.0007) |                       |
| <b>Parental SES</b>                        |                        |                        |                        |                        |                       |
| <i>Less Than High School</i>               |                        | 0.594**<br>(0.219)     | 0.599**<br>(0.220)     | 0.634**<br>(0.220)     |                       |
| <i>High School</i>                         |                        | 0.492**<br>(0.153)     | 0.495**<br>(0.153)     | 0.501**<br>(0.153)     |                       |
| <i>Bachelor's Degree [Reference]</i>       |                        |                        |                        |                        |                       |
| <b>Respondent History of Arrest</b>        |                        | -0.626***<br>(0.125)   | -0.595***<br>(0.125)   | -0.584***<br>(0.125)   |                       |
| <b>Wave I Family Structure</b>             |                        |                        |                        |                        |                       |
| <i>Two Parent, Biological [Reference]</i>  |                        |                        |                        |                        |                       |
| <i>Two Parent, One Biological</i>          |                        | -0.207<br>(0.193)      | -0.204<br>(0.193)      | -0.214<br>(0.193)      |                       |
| <i>Single Mother</i>                       |                        | 0.166<br>(0.179)       | 0.171<br>(0.179)       | 0.159<br>(0.179)       |                       |
| <i>Single Father</i>                       |                        | -0.555+<br>(0.310)     | -0.540+<br>(0.310)     | -0.518+<br>(0.310)     |                       |
| <i>Other Family Structure</i>              |                        | 0.325<br>(0.295)       | 0.321<br>(0.295)       | 0.344<br>(0.295)       |                       |
| <b>Biological Father Unknown at Wave I</b> |                        | 0.050<br>(0.231)       | 0.046<br>(0.231)       | 0.040<br>(0.231)       |                       |
| <b>Father Closeness</b>                    |                        | 0.147*<br>(0.060)      | 0.144*<br>(0.061)      | 0.133*<br>(0.061)      |                       |

|                                                              |           |           |           |           |          |
|--------------------------------------------------------------|-----------|-----------|-----------|-----------|----------|
| Repeated Childhood Physical Abuse                            | 0.462*    | 0.475*    | 0.488*    |           |          |
|                                                              | (0.208)   | (0.208)   | (0.208)   |           |          |
| Proportion of Families in County Residing Below Poverty      | 4.552***  | 4.574***  | 4.548***  |           |          |
|                                                              | (1.167)   | (1.167)   | (1.168)   |           |          |
| Proportion of Families in County Classified as Non-White     | 0.048     | 0.114     | 0.157     |           |          |
|                                                              | (0.374)   | (0.508)   | (0.508)   |           |          |
| County Population Density                                    | -0.031    | -0.030    | -0.034    |           |          |
|                                                              | (0.048)   | (0.048)   | (0.048)   |           |          |
| Low Self Control                                             | 0.319*    | 0.332*    | 0.338*    |           |          |
|                                                              | (0.140)   | (0.141)   | (0.141)   |           |          |
| Proportion of Stressful Life Events                          |           | -0.895*** | -0.719**  |           |          |
|                                                              |           | (0.218)   | (0.221)   |           |          |
| Depression                                                   |           |           | -0.054*** |           |          |
|                                                              |           |           | (0.010)   |           |          |
| Suicidal Thoughts                                            |           |           | 0.103     |           |          |
|                                                              |           |           | (0.088)   |           |          |
| Hours of Sedentary Behaviors Per Day                         |           |           | 0.049***  |           |          |
|                                                              |           |           | (0.007)   |           |          |
| Fast Food Consumption at Wave IV                             |           |           | -0.027    |           |          |
|                                                              |           |           | (0.028)   |           |          |
| Soft Drink Consumption at Wave IV                            |           |           | 0.037     |           |          |
|                                                              |           |           | (0.333)   |           |          |
| BMI Wave II                                                  |           |           |           | 0.0458*** |          |
|                                                              |           |           |           | (0.0132)  |          |
| Depression Wave II                                           |           |           |           | 0.0484+   |          |
|                                                              |           |           |           | (0.0280)  |          |
| Proportion of Stressful Life Events at Wave II               |           |           |           | -1.498    |          |
|                                                              |           |           |           | (0.941)   |          |
| Increase in Depression, Waves II-IV                          |           |           |           | -0.123    |          |
|                                                              |           |           |           | (0.143)   |          |
| Increase In Suicidal Thoughts, Waves II-IV                   |           |           |           | -0.152    |          |
|                                                              |           |           |           | (0.302)   |          |
| Increase in Proportion of Stressful Life Events , Wave II-IV |           |           |           | -0.243    |          |
|                                                              |           |           |           | (0.156)   |          |
| First Arrest, Waves II-IV                                    |           |           |           | -0.336*   |          |
|                                                              |           |           |           | (0.141)   |          |
| Intercept                                                    | 8.279 *** | 6.947***  | 6.767***  | 6.821***  | 9.682*** |
|                                                              | (0.353)   | (0.477)   | (0.479)   | (0.578)   | (0.717)  |
| R-Square                                                     | 0.1997    | 0.2083    | 0.2083    | 0.2104    | 0.024    |
| Number of Individuals                                        | 7216      | 7216      | 7216      | 7216      | 5339     |
| Number of Observations                                       | 25057     | 25057     | 25057     | 25057     |          |

**Notes:**

Random effects coefficients with standard errors in parentheses.

\* $p < .05$  \*\* $p < .01$  \*\*\* $p < .001$  [two-tailed test], +  $p < 0.05$  [one-tailed test].

**Web Table 3: Full regression output for female Add Health respondents for models presented in Table 1.**

|                                           | (1)                    | (2)                    | (3)                    | (4)                    | (5)                   |
|-------------------------------------------|------------------------|------------------------|------------------------|------------------------|-----------------------|
| Parental Incarceration                    |                        |                        |                        |                        |                       |
| <i>Parent Ever Incarcerated</i>           | 0.600***<br>(0.152)    | 0.518**<br>(0.118)     | 0.510**<br>(0.118)     | 0.489**<br>(0.118)     |                       |
| <i>Parent Incarcerated Waves II-IV</i>    |                        |                        |                        |                        | 0.920*<br>(0.409)     |
| Race                                      |                        |                        |                        |                        |                       |
| <i>White [Reference]</i>                  |                        |                        |                        |                        |                       |
| <i>Black</i>                              | 2.174***<br>(0.154)    | 1.755***<br>(0.188)    | 1.748***<br>(0.188)    | 1.704***<br>(0.188)    | 1.407***<br>(0.190)   |
| <i>Hispanic</i>                           | 0.754***<br>(0.182)    | 0.297<br>(0.209)       | 0.301<br>(0.209)       | 0.308<br>(0.208)       | 0.710**<br>(0.223)    |
| <i>Asian</i>                              | -1.583***<br>(0.279)   | -1.369***<br>(0.308)   | -1.361***<br>(0.308)   | -1.378***<br>(0.306)   | -0.834*<br>(0.337)    |
| <i>Native American</i>                    | 2.029***<br>(0.498)    | 1.854***<br>(0.496)    | 1.847***<br>(0.495)    | 1.851***<br>(0.492)    | 1.038+<br>(0.611)     |
| <i>Other Race</i>                         | -1.315+<br>(0.675)     | -1.380*<br>(0.673)     | -1.382*<br>(0.673)     | -1.392*<br>(0.669)     | 0.302<br>(0.871)      |
| Age                                       | 1.122***<br>(0.038)    | 1.124***<br>(0.038)    | 1.118***<br>(0.038)    | 1.126***<br>(0.038)    | -0.188***<br>(0.0506) |
| Age-Squared                               | -0.0140***<br>(0.0009) | -0.0141***<br>(0.0009) | -0.0141***<br>(0.0009) | -0.0143***<br>(0.0009) |                       |
| Parental SES                              |                        |                        |                        |                        |                       |
| <i>Less Than High School</i>              |                        | 1.565***<br>(0.231)    | 1.560***<br>(0.231)    | 1.544***<br>(0.231)    |                       |
| <i>High School</i>                        |                        | 0.771***<br>(0.168)    | 0.767***<br>(0.168)    | 0.745***<br>(0.168)    |                       |
| <i>Bachelor's Degree [Reference]</i>      |                        |                        |                        |                        |                       |
| Respondent History of Arrest              |                        | -0.170<br>(0.171)      | -0.196<br>(0.172)      | -0.213<br>(0.171)      |                       |
| Wave I Family Structure                   |                        |                        |                        |                        |                       |
| <i>Two Parent, Biological [Reference]</i> |                        |                        |                        |                        |                       |
| <i>Two Parent, One Biological</i>         |                        | -0.302<br>(0.207)      | -0.309<br>(0.207)      | -0.306<br>(0.206)      |                       |
| <i>Single Mother</i>                      |                        | 0.426*<br>(0.180)      | 0.419*<br>(0.181)      | 0.422*<br>(0.180)      |                       |
| <i>Single Father</i>                      |                        | -0.553<br>(0.394)      | -0.561<br>(0.394)      | -0.580<br>(0.391)      |                       |
| <i>Other Family Structure</i>             |                        | 0.089<br>(0.283)       | 0.078<br>(0.283)       | 0.088<br>(0.282)       |                       |
| Biological Father Unknown at Wave I       |                        | 0.151<br>(0.241)       | 0.151<br>(0.241)       | 0.151<br>(0.241)       |                       |
| Father Closeness                          |                        | 0.169**<br>(0.057)     | 0.172**<br>(0.057)     | 0.172**<br>(0.057)     |                       |
| Repeated Childhood Physical Abuse         |                        | 0.417+<br>(0.238)      | 0.406+<br>(0.238)      | 0.398+<br>(0.237)      |                       |

|                                                              |                     |                     |                     |                      |                     |
|--------------------------------------------------------------|---------------------|---------------------|---------------------|----------------------|---------------------|
| Proportion of Families in County Residing Below Poverty      | 6.533***<br>(1.218) | 6.525***<br>(1.216) | 6.439***<br>(1.214) |                      |                     |
| Proportion of Families in County Classified as Non-White     | 0.015<br>(0.541)    | 0.022<br>(0.540)    | 0.052<br>(0.537)    |                      |                     |
| County Population Density                                    | -0.076<br>(0.049)   | -0.076<br>(0.050)   | -0.081<br>(0.050)   |                      |                     |
| Low Self Control                                             | 0.722***<br>(0.154) | 0.713***<br>(0.154) | 0.709***<br>(0.154) |                      |                     |
| Proportion of Stressful Life Events                          |                     | 0.711**<br>(0.266)  | 0.746**<br>(0.269)  |                      |                     |
| Depression                                                   |                     |                     | -0.003<br>(0.009)   |                      |                     |
| Suicidal Thoughts                                            |                     |                     | -0.023<br>(0.087)   |                      |                     |
| Hours of Sedentary Behaviors Per Day                         |                     |                     | 0.071***<br>(0.010) |                      |                     |
| Fast Food Consumption at Wave IV                             |                     |                     | -0.021<br>(0.033)   |                      |                     |
| Soft Drink Consumption at Wave IV                            |                     |                     | 0.897**<br>(0.309)  |                      |                     |
| BMI Wave II                                                  |                     |                     |                     | 0.139***<br>(0.0148) |                     |
| Depression Wave II                                           |                     |                     |                     | 0.0478+<br>(0.0275)  |                     |
| Proportion of Stressful Life Events at Wave II               |                     |                     |                     | 2.353+<br>(1.426)    |                     |
| Increase in Depression, Waves II-IV                          |                     |                     |                     | 0.122<br>(0.171)     |                     |
| Increase In Suicidal Thoughts, Waves II-IV                   |                     |                     |                     | 0.832*<br>(0.340)    |                     |
| Increase in Proportion of Stressful Life Events , Wave II-IV |                     |                     |                     | 0.403*<br>(0.184)    |                     |
| First Arrest, Waves II-IV                                    |                     |                     |                     | -0.494*<br>(0.221)   |                     |
| Intercept                                                    | 8.055***<br>(0.262) | 6.169***<br>(0.332) | 5.909***<br>(0.502) | 4.857***<br>(0.588)  | 4.642***<br>(0.851) |
| R-Square                                                     | 0.1841              | 0.1986              | 0.1991              | 0.2027               | 0.044               |
| Number of Individuals                                        | 8254                | 8254                | 8254                | 8254                 | 5175                |
| Number of Observations                                       | 27331               | 27331               | 27331               | 27331                |                     |

**Notes:**

Random effects coefficients with standard errors in parentheses.

\* $p < .05$  \*\* $p < .01$  \*\*\* $p < .001$  [two-tailed test], +  $p < 0.05$  [one-tailed test].
